# Supplementary material for: Targeting S1PR1/STAT3 loop abrogates desmoplasia and chemosensitizes pancreatic cancer to gemcitabine
Source: PubMed Central journal article supplement — Theranostics. 2018 Jun 13;8(14):3824–40. doi: 10.7150/thno.25308 (PMC6071521; doi:10.7150/thno.25308), 2018-06-13

**Targeting S1PR1/STAT3 loop abrogates desmoplasia and chemosensitizes  
gemcitabine to pancreatic cancer**

Manendra Babu Lankadasari<sup>1\*</sup>, Jayasekharan S. Aparna<sup>1</sup>, Sabira Mohammed<sup>1</sup>, Shirley James<sup>1</sup>, Kazunori Aoki<sup>2</sup>, VS Binu<sup>3</sup>, Sindhu Nair<sup>4</sup>, Kuzhuvelil B. Harikumar<sup>1</sup>

**Table S1: FTY720 and in combination with gemcitabine inhibited metastasis and ascites in an orthotopic model of pancreatic cancer**

| Treatment group    | Mice | Number of mice with dissemination (metastasis) |                     |       | Presence of ascites |        |
|--------------------|------|------------------------------------------------|---------------------|-------|---------------------|--------|
|                    |      | Abdominal cavity                               | Intestine and colon | Liver | Mild                | Severe |
| <b>Vehicle</b>     | n=6  | 6                                              | 2                   | 3     | 2                   | 3      |
| <b>FTY720</b>      | n=6  | 5                                              | 1                   | 1     | 0                   | 1      |
| <b>Gemcitabine</b> | n=6  | 4                                              | 2                   | 1     | 1                   | 4      |
| <b>FTY + Gem</b>   | n=5  | 2                                              | 0                   | 0     | 2                   | 0      |

**Table S2:****Immune & Inflammatory Responses:**

Immunostimulatory Factors: IFNG, IL2, IL12A, IL12B, IL15, TNF.

Immunosuppressive Factors: CD274 (PD-L1), CSF2 (GM-CSF), CTLA4, CXCL12 (SDF1), CXCL5, IDO1 (IDO), IL10, IL13, IL4, IL8, MIF, NOS2 (iNOS), PDCD1 (PD1), PTGS2 (COX2), TGFB1, VEGFA.

Pro-Inflammatory Genes: CCL2 (MCP-1), CCL20 (MIP-3A), IFNG, IL1A, IL1B, IL2, IL6, IL12A, IL12B, IL17A, IL23A, PTGS2 (COX2), TLR4, TNF, VEGFA.

Anti-Inflammatory Genes: IL4, IL10, IL13, TGFB1.

Enzymatic Modulators of Inflammation & Immunity: AICDA (AID), GZMA, GZMB, IDO1 (IDO), NOS2 (iNOS), PTGS2 (COX2).

**Antigen Presentation:** HLA-A, HLA-B, HLA-C, MICA, MICB.

**Chemokines:** CCL2 (MCP-1), CCL4 (MIP-1B), CCL5 (RANTES), CCL18 (PARC), CCL20 (MIP-3A), CCL21, CCL22 (MDC), CCL28, CXCL1, CXCL2, CXCL5, CXCL9 (MIG), CXCL10 (IP-10), CXCL11 (I-TAC, IP-9), CXCL12 (SDF1).

**Chemokine Receptors:** ACKR3 (CXCR7), CCR1, CCR2, CCR4, CCR7, CCR9, CCR10, CXCR1 (IL8RA), CXCR2 (IL8RB), CXCR3, CXCR4, CXCR5.

**Interleukins:** IL1A, IL1B, IL2, IL4, IL6, IL8, IL10, IL12A, IL12B, IL13, IL15, IL17A, IL23A.

**Other Cytokines:** KITLG (SCF), MIF, SPP1, TNF, TNFSF10 (TRAIL).

**Growth Factors & Receptors:** CSF1 (MCSF), CSF2 (GM-CSF), CSF3 (GCSF), EGF, EGFR, IGF1, TGFB1, VEGFA.

**Signal Transduction:**

Interferon Signaling: GBP1, IFNG, IL6, IRF1.

Interferon-Responsive Genes: CCL2 (MCP-1), CCL5 (RANTES), CXCL9 (MIG), CXCL10 (IP-10), GBP1, IRF1, MYD88, STAT1, TLR3, TNFSF10 (TRAIL).

NFkB Targets: BCL2L1 (BCL-XL), CCL2 (MCP-1), CCL5 (RANTES), CSF1 (MCSF), CSF2 (GM-CSF), CSF3 (GCSF), IFNG, IL8, TNF.

STAT Targets: CCL2 (MCP-1), CCL4 (MIP-1B), CCL5 (RANTES), CSF1 (MCSF), CSF2 (GM-CSF), CSF3 (GCSF), CXCL9 (MIG), CXCL10 (IP-10), CXCL11 (I-TAC, IP-9), CXCL12 (SDF1), IL1B, IL6, IL8, IL10, IL17A, IL23A, MYC.

Toll-Like Receptor Signaling: TLR2, TLR3, TLR4, MYD88.

Transcription Factors: FOXP3, HIF1A, IRF1, MYC, NFKB1, STAT1, STAT3, TP53 (p53).

**Apoptosis:**

Pro-Apoptotic: FASLG (TNFSF6), TNF, TNFSF10 (TRAIL), TP53 (p53).

Anti-Apoptotic: BCL2, BCL2L1 (BCL-XL), MYC, STAT3.

**Table S3: List of primers used to check the expression of various gemcitabine metabolizing enzymes and EMT markers**

| S. No | Primer name        | Primer sequence          |
|-------|--------------------|--------------------------|
| 1     | hDCK-F             | CAGCTTGCCTCTCTGAATGG     |
| 2     | hDCK-R             | TCCAGTCATGCCAGTCTTGA     |
| 3     | hCDA-F             | CTGCAGGCAAGTCATGAGAG     |
| 4     | hCDA-R             | GCATTCTCTGGCTGTCACTG     |
| 5     | hDCTD-F            | TGCTACATGTGCTGGAAGGA     |
| 6     | hDCTD-R            | TGCCACCCTATCTCGGATTC     |
| 7     | hRRM1-F            | GGAGGAATTGGTGTGCTGT      |
| 8     | hRRM1-R            | GCTGCTCTTCCTTTCCTGTG     |
| 9     | hRRM2-F            | CCCGCTGTTTCTATGGCTTC     |
| 10    | hRRM2-R            | CCCAGTCTGCCTTCTTCTTG     |
| 11    | hABCC5-F           | AGAACTCGACCGTTGGAATGC    |
| 12    | hABCC5-R           | TCATCCAGGATTCTGAGCTGAG   |
| 13    | hTWIST1-F          | GGCTCAGCTACGCCTTCTC      |
| 14    | hTWIST1-R          | TCCTTCTCTGGAAACAATGACA   |
| 15    | hTWIST2-F          | TCTGACAAGCTGAGCAAGATCC   |
| 16    | hTWIST2-R          | CTGCAGCTGGTCATCTTATTGTC  |
| 17    | hSlug-F            | AGATGCATATTCGGACCCAC     |
| 18    | hSlug-R            | CCTCATGTTTGTGCAGGAGA     |
| 19    | hSnail-F           | AATCGGAAGCCTAACTACAGCGAG |
| 20    | hSnail-R           | CCTTGGCCTCAGAGAGCTGG     |
| 21    | hE-cadherin-F      | GAAGGTGACAGAGCCTCTGGAT   |
| 22    | hE-cadherin-R      | GATCGGTTACCGTGATCAAATC   |
| 23    | hGli1-F            | AGATGAATCACCAAAAAGGG     |
| 24    | hGli1-R            | ATATCACCTTCCAAGGGTTC     |
| 25    | hGli3-F            | CTCCATTGCATATGACTTCC     |
| 26    | hGli3-R            | GCGGATATAGTCCATGTAGG     |
| 27    | hShh-F             | GAGCGATTTAAGGAACTCAC     |
| 28    | hShh-R             | CCTTACACCTCTGAGTCATC     |
| 29    | hI16-F             | AAATTCGGTACATCCTCGACGGCA |
| 30    | hI16-R             | GTGCCTCTTTGCTGCTTTCACACA |
| 31    | h $\beta$ -Actin-F | CCAGCTCACCATGGATGATG     |
| 32    | h $\beta$ -Actin-R | ATGCCGGAGCCGTTGTC        |

## **Supplementary Figure legends**

### **Figure S1: FTY720 inhibited the growth and induces apoptosis in pancreatic cancer cell lines**

(A) The cytotoxic effect of FTY720 was assessed using MTT assay on mouse pancreatic acinar cells and (B) Human pancreatic ductal epithelia cells (HPDE) after 24 and 48 h (C) PAN 02 cells were treated with FTY720 (10  $\mu$ M and 15  $\mu$ M) and the rate of apoptosis was quantified after 24 h using annexin V-FITC staining. Scatter plot from FACS (left panel) and quantification of live and apoptotic population (right panel)(D) The effect of FTY720 on cell cycle was quantified using propidium iodide staining after treating PAN 02 cells with 10  $\mu$ M of FTY720. Data is presented as mean  $\pm$  S.D and representative data from at least 3 independent experiments is shown

### **Figure S2: FTY720 exhibited anti-migratory property in the pancreatic cancer cell lines**

(A) The anti-migratory capability of FTY720 was checked using wound healing assay. Briefly, a scratch was made when the PAN 02 cells reach 90% confluence and treated with an increased dose of FTY720 and the closure of wound was monitored at 12 h and 24 h of time intervals. Representative images (top panel) and quantification (bottom panel).

### **Figure S3: FTY720 enhanced the effect of gemcitabine in vitro**

(A) PAN 02 cells were treated with FTY720 in combination with gemcitabine and the loss in mitochondrial membrane potential was quantified using DiCO6(3) staining after 24 h

### **Figure S4: FTY720 in combination with gemcitabine reduces the tumor burden in vivo**

(A) Bioluminescent quantification of MIA PaCa-2 luc using IVIS measurement. Quantification was done and the data for day15 and 30 were plotted. (B) Necropsy images of mice with orthotopically implanted pancreatic cancer.

### **Figure S5: FTY720 in combination with gemcitabine altered NF-kB dependent gene expression and other inflammatory genes**

(A) Heat map showing the expression of NF-kB driven genes after performing RT<sup>2</sup> profiler array. Briefly RNA was isolated from each sample was used for RT<sup>2</sup> profiler array. Values are expressed in fold. Representative data from each experiment is shown here.

(B) and (C) Heat map showing the expression of genes associated with inflammation and immunity after performing RT<sup>2</sup> profiler array. Briefly RNA was isolated from each sample was used for RT<sup>2</sup> profiler array. Values are expressed in fold. Representative data from each experiment is shown here.

### **Figure S6: FTY720 in combination with gemcitabine reduced tumor burden in syngeneic mice model**

(A) Bioluminescent quantification of PAN 02- luc using IVIS measurement. Quantification was done and the data for day15 and 30 were plotted. (B) Necropsy images of mice with

orthotopically implanted pancreatic cancer. **(C)** Quantification data of myofibroblast density  
**(D)** Quantification data of collagen deposition in tumor.  $p \leq 0.001$

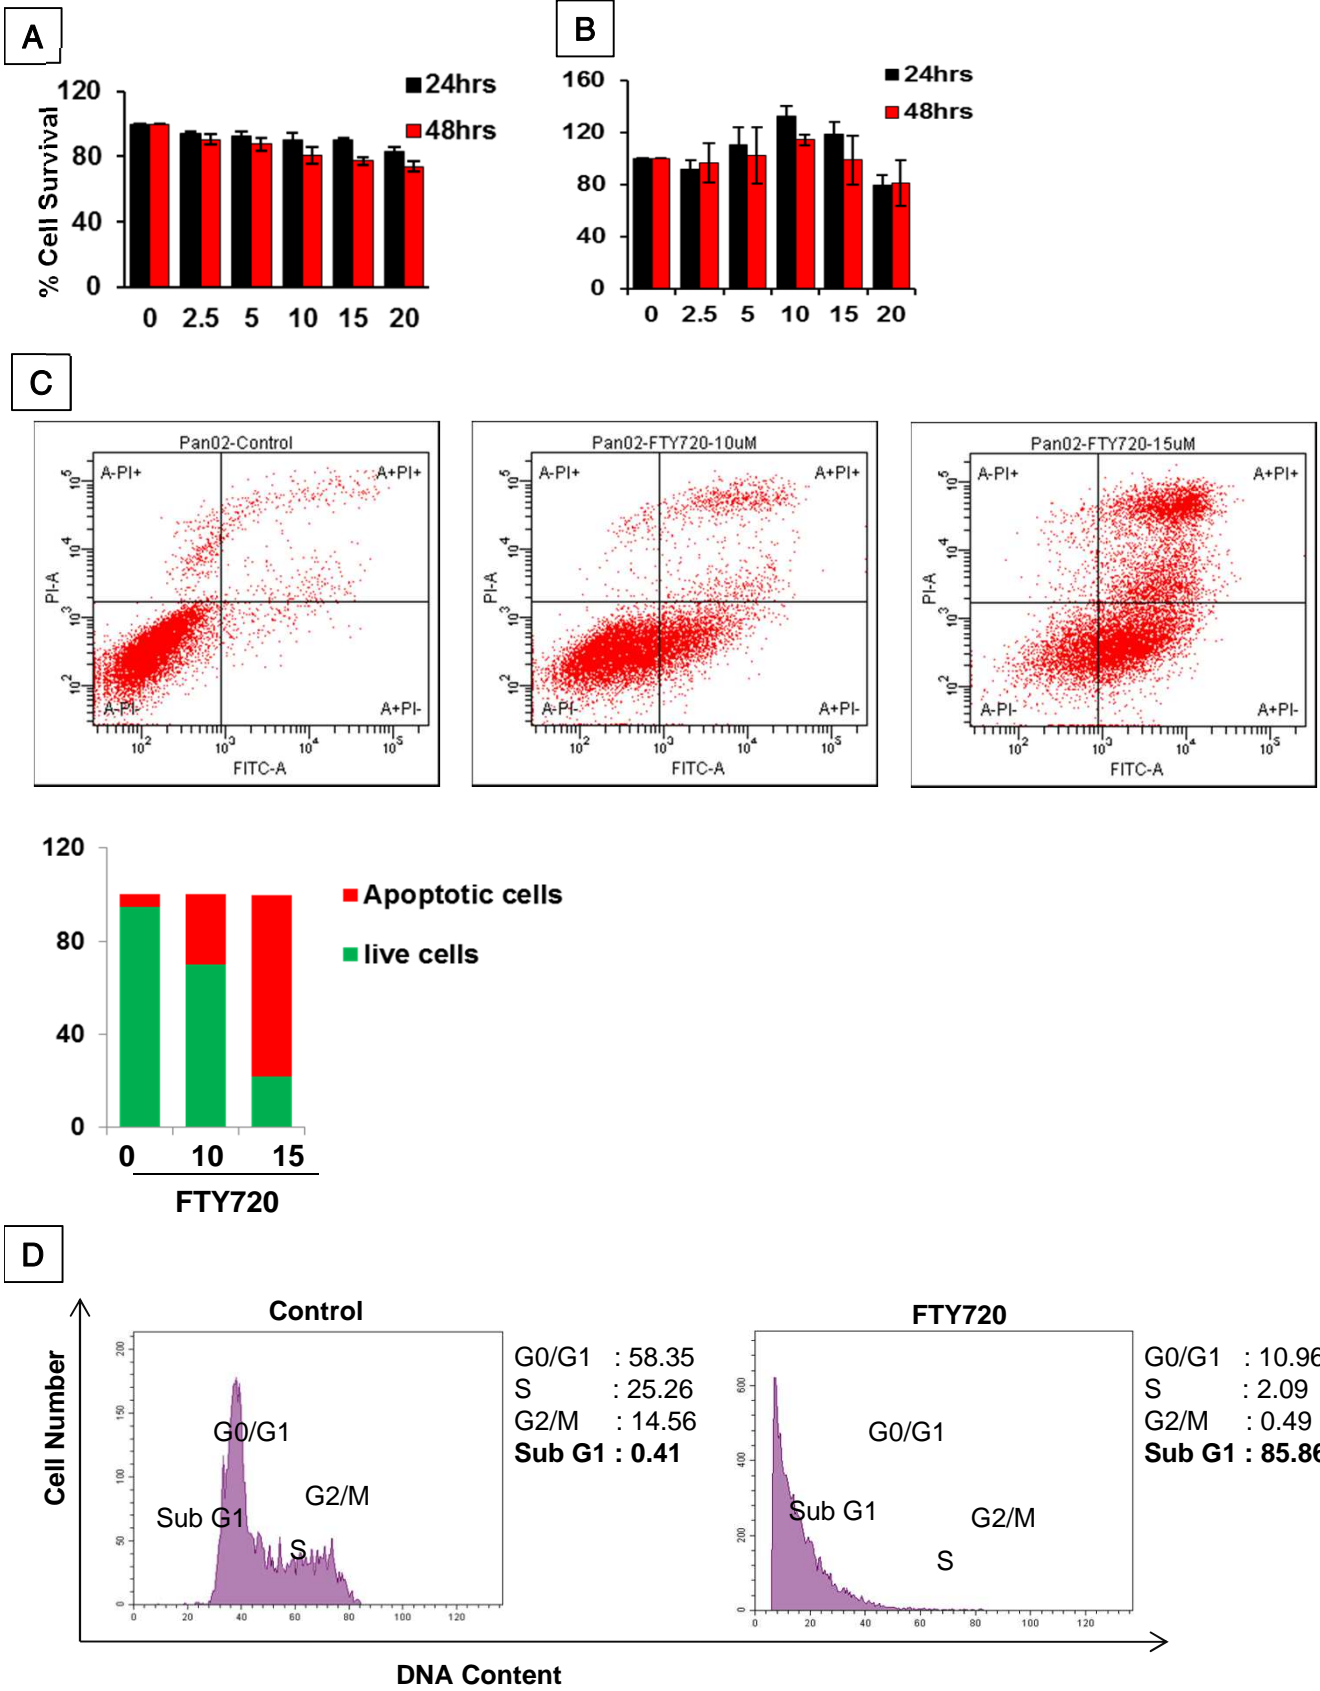

A

S2

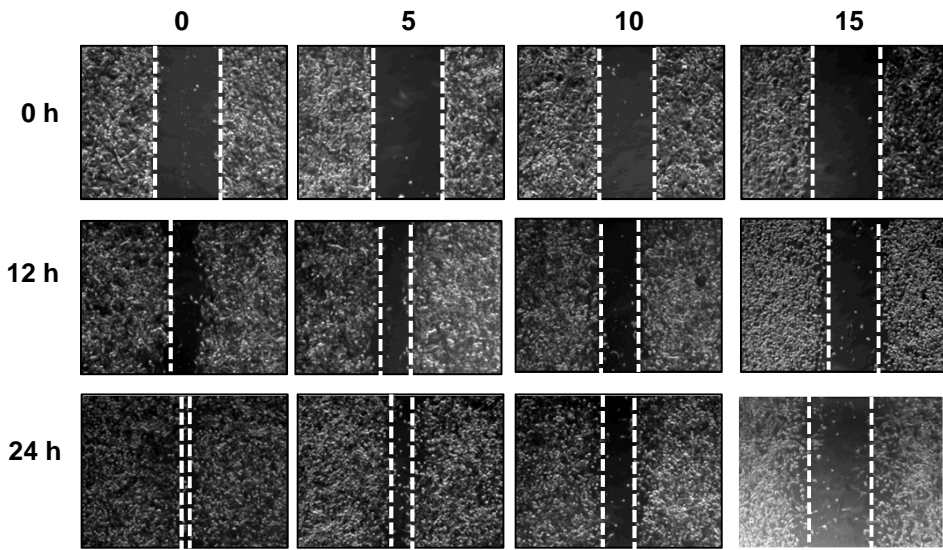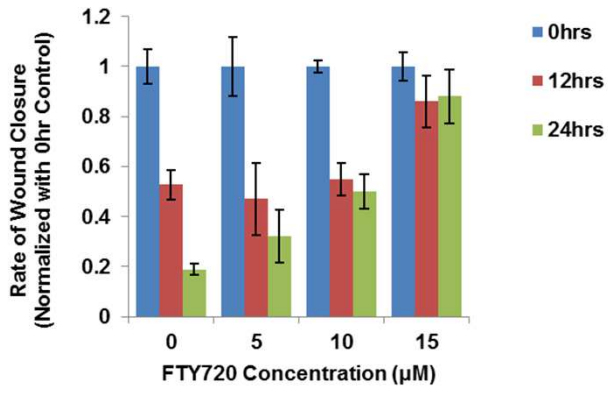

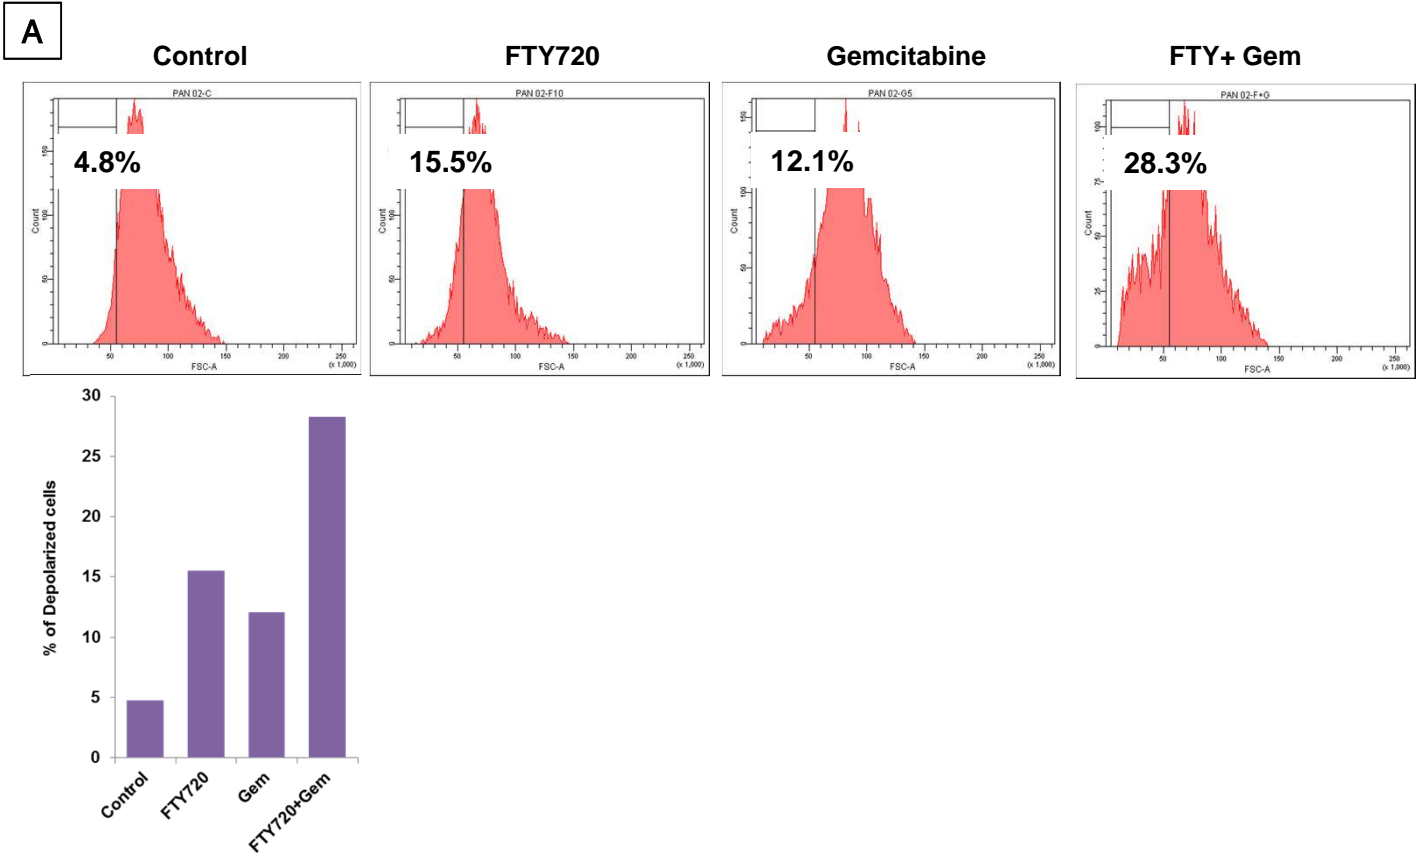



A

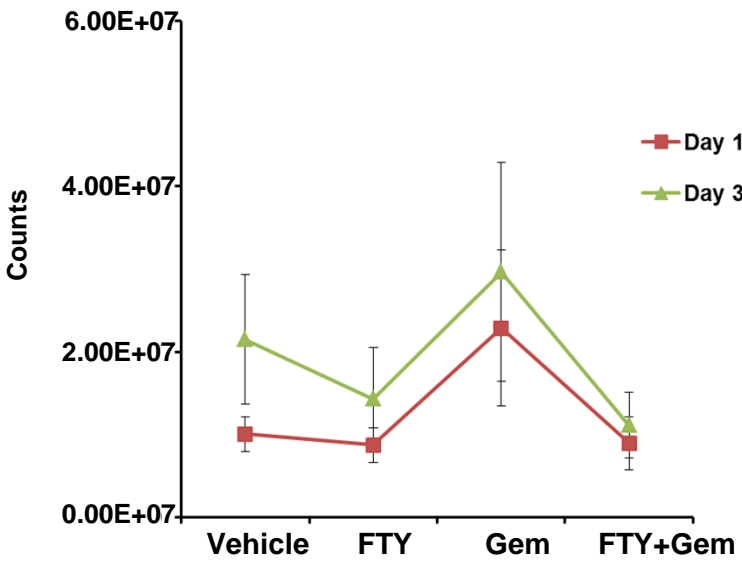

B

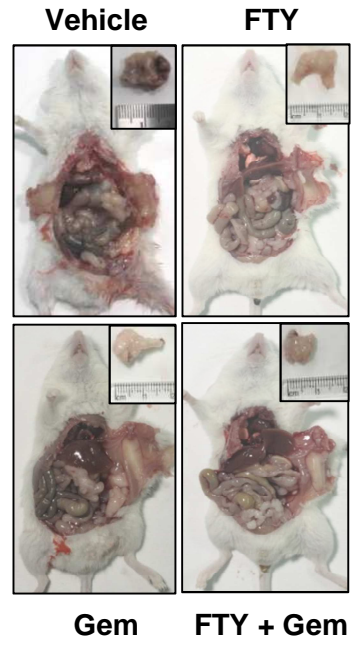

A

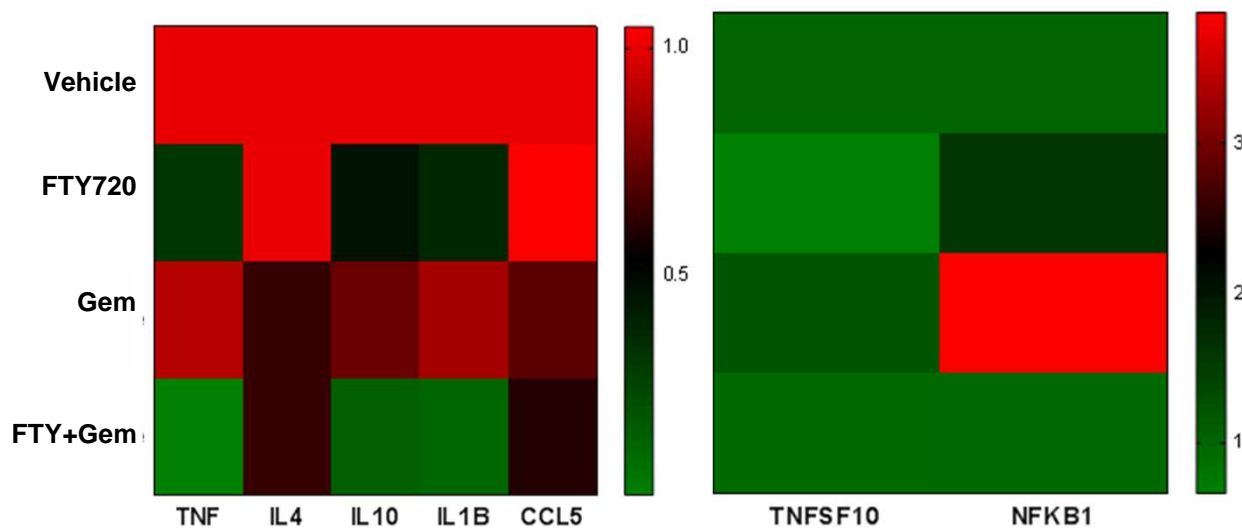

B

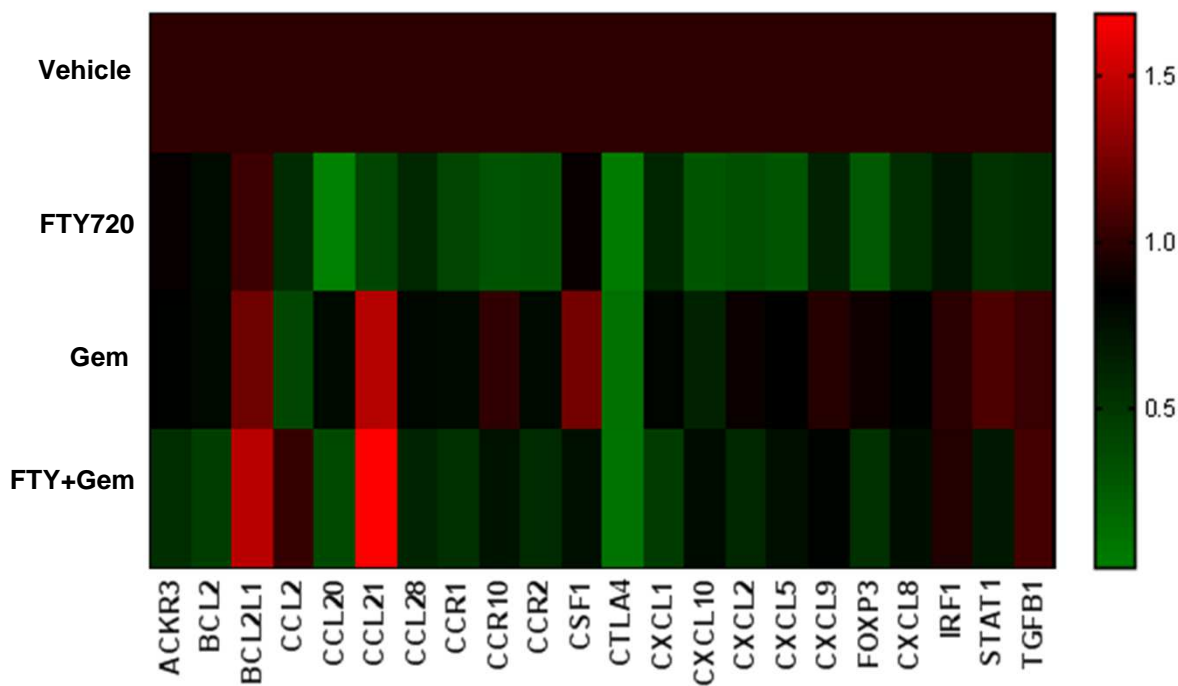

C

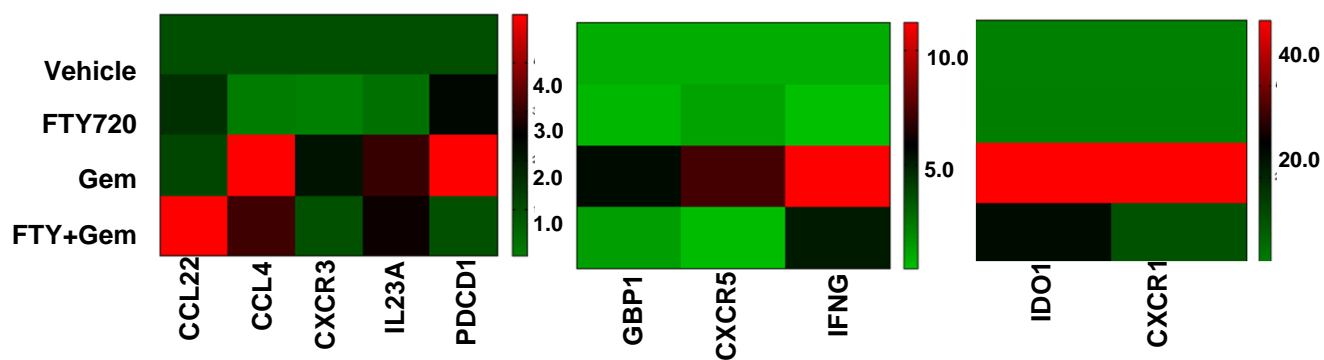

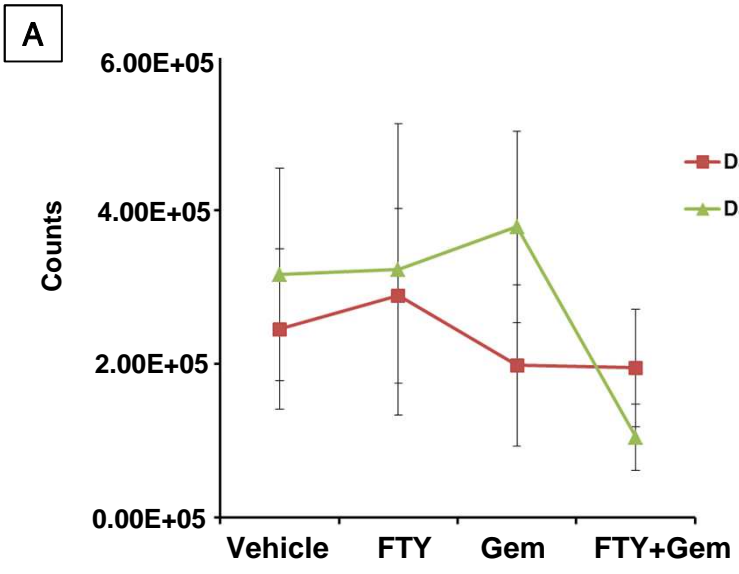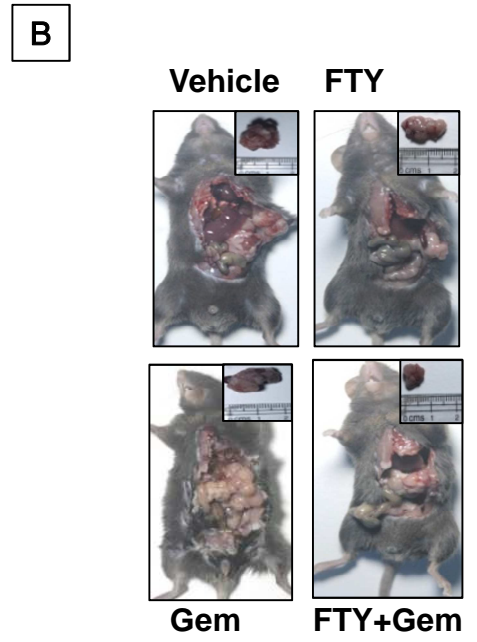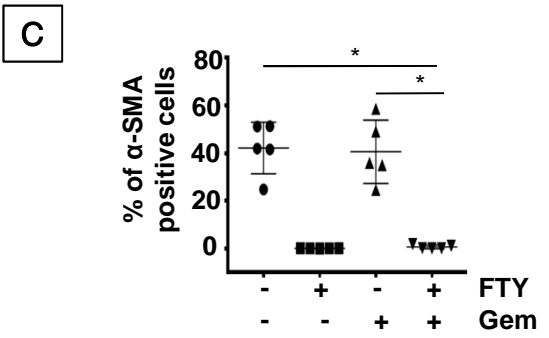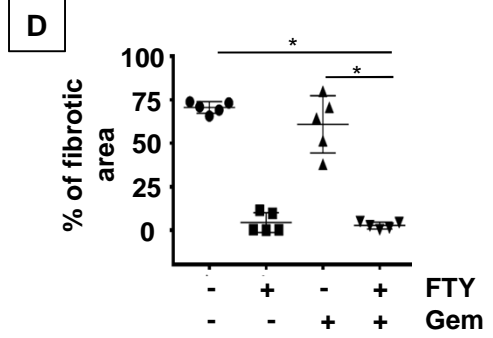

Supplement: thnov08p3824s1.pdf [file thnov08p3824s1.pdf]
